# Supplementary material for: Genomic dissection of plant development and its impact on thousand grain weight in barley through nested association mapping
Source: PubMed Central journal article supplement (PMC4809299; doi:10.1093/jxb/erw070), 2016-03-01
Supplement: supp_erw070_supplementary_figures_S1_S2.pdf [file supp_erw070_supplementary_figures_S1_S2.pdf]

**Fig. S1) Frequency distributions of BLUEs for all investigated traits**

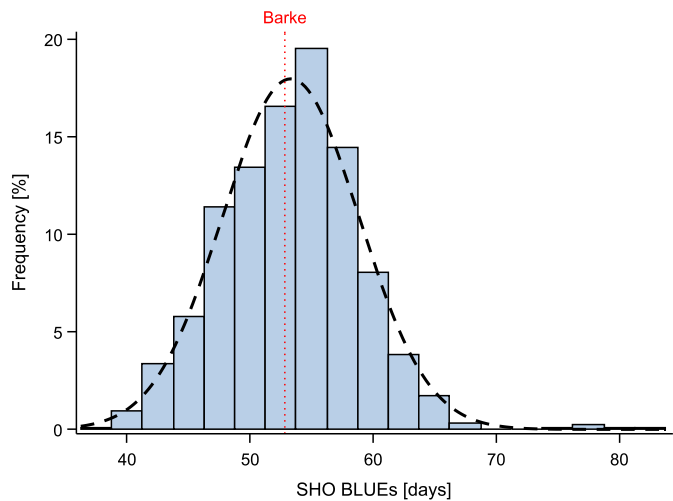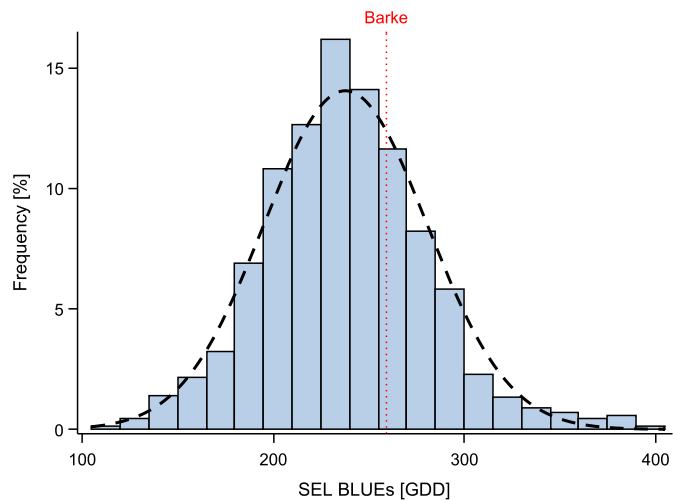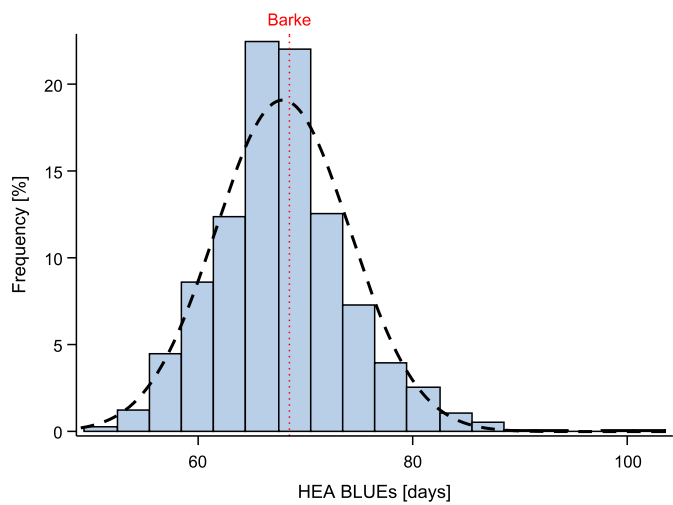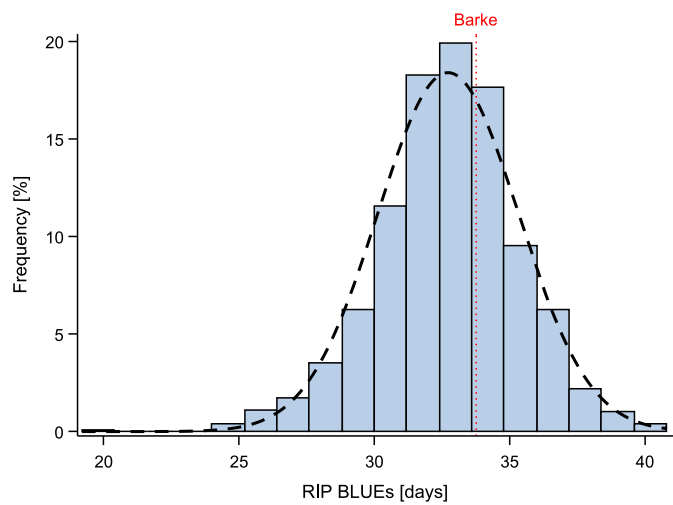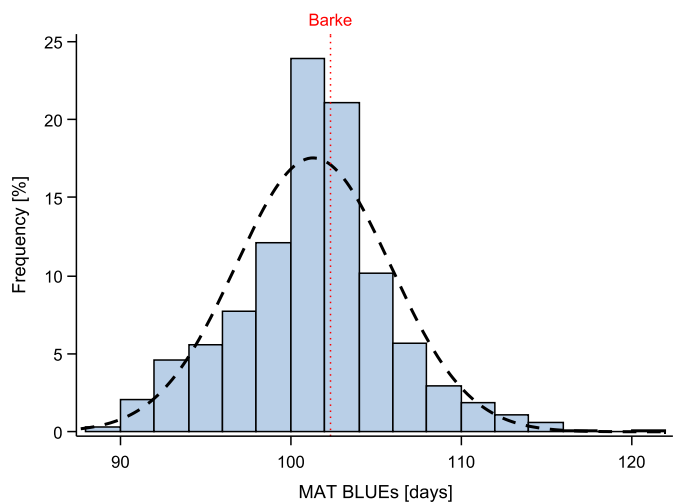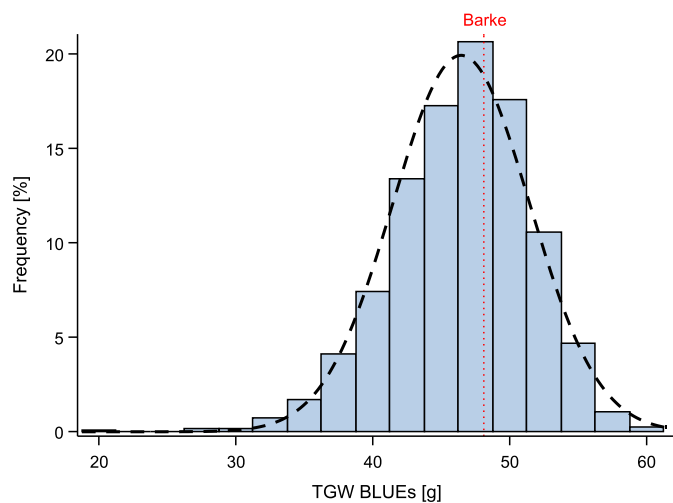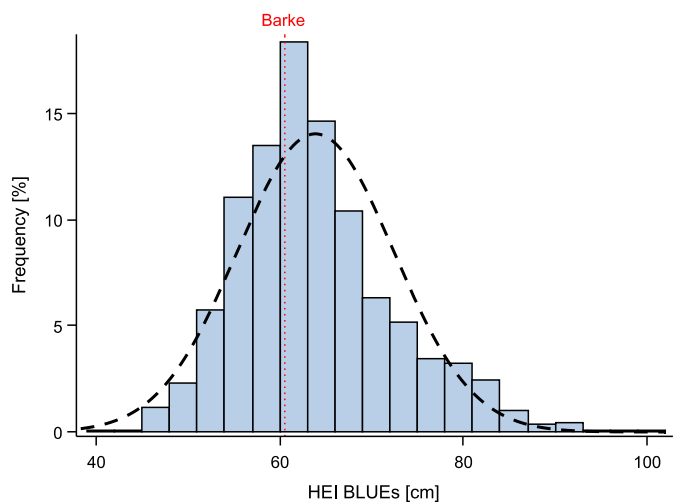

**Figure S2) Venn diagrams of shared QTL across traits.**

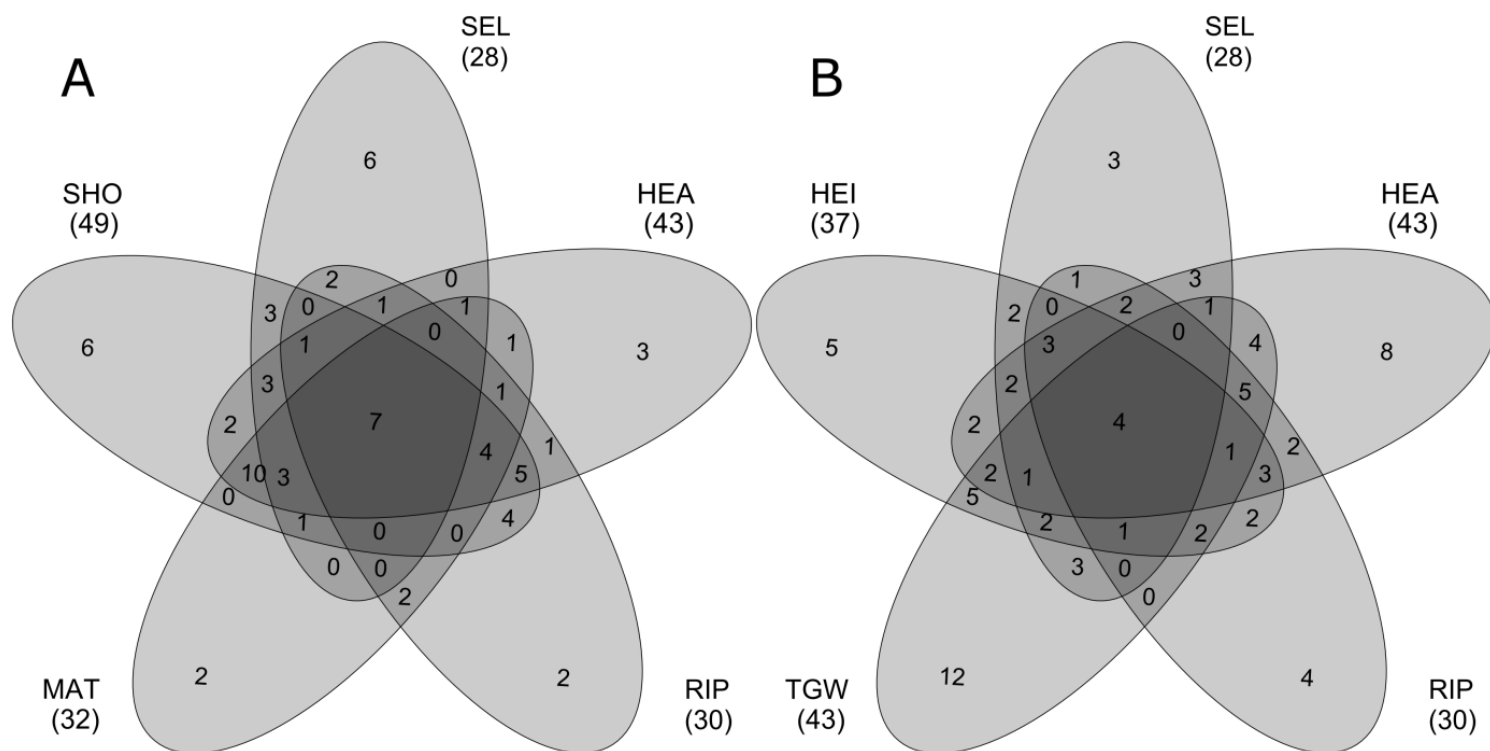

Different traits are represented by elliptic areas and numbers in their overlap indicate the number of shared QTL. Numbers in the outer non-overlapping regions represent trait-specific QTL. Numbers in brackets indicate the total number of QTL per trait. **A)** Shared QTL across the developmental traits SHO, SEL, HEA, RIP and MAT. **B)** Shared QTL across the developmental traits SEL, HEA and RIP, as well as TGW and HEI.
